# Supplementary material for: Ion chemistry of phthalates in selected ion flow tube mass spectrometry: isomeric effects and secondary reactions with water vapour
Source: Royal Society of Chemistry journal article supplement (doi:10.1039/d0cp00538j), 2020-01-01
Supplement: d0cp00538j1.pdf [file d0cp00538j1.pdf]

## Ion chemistry of phthalates in selected ion flow tube mass spectrometry: isomeric effects and secondary reactions with water vapor

M. Lacko,<sup>a,b</sup> B. Michalczuk,<sup>c</sup> Š. Matejíček<sup>c</sup> and P. Španěl<sup>a</sup>

Primary reaction with  $\text{H}_3\text{O}^+$

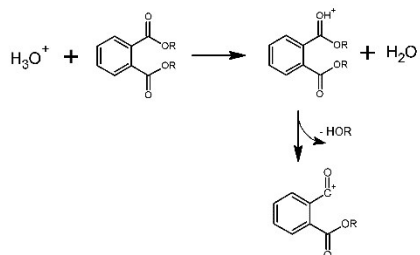

Secondary reaction with  $\text{H}_2\text{O}$  - only for DMP meta and para isomers

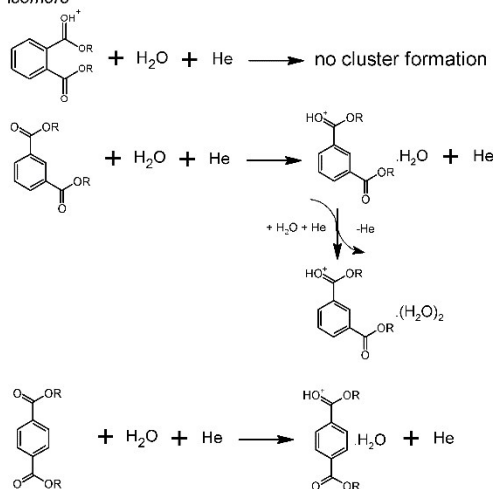

Primary reaction with  $\text{NO}^+$

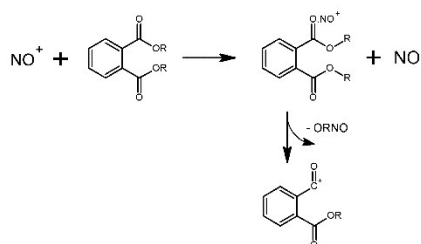

Secondary reaction with  $\text{H}_2\text{O}$

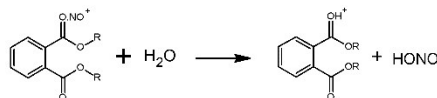

Primary reaction with  $\text{O}_2^+$

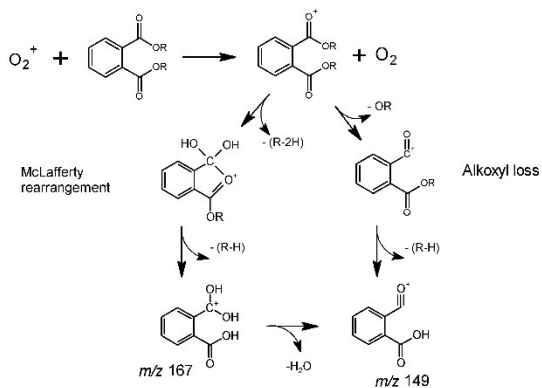

Scheme S1: Mass spectrum of DBP using  $\text{H}_3\text{O}^+$  reagent ions. Selected peaks presented during the direct sampling of DPB headspace are not related to the DBP ion chemistry.

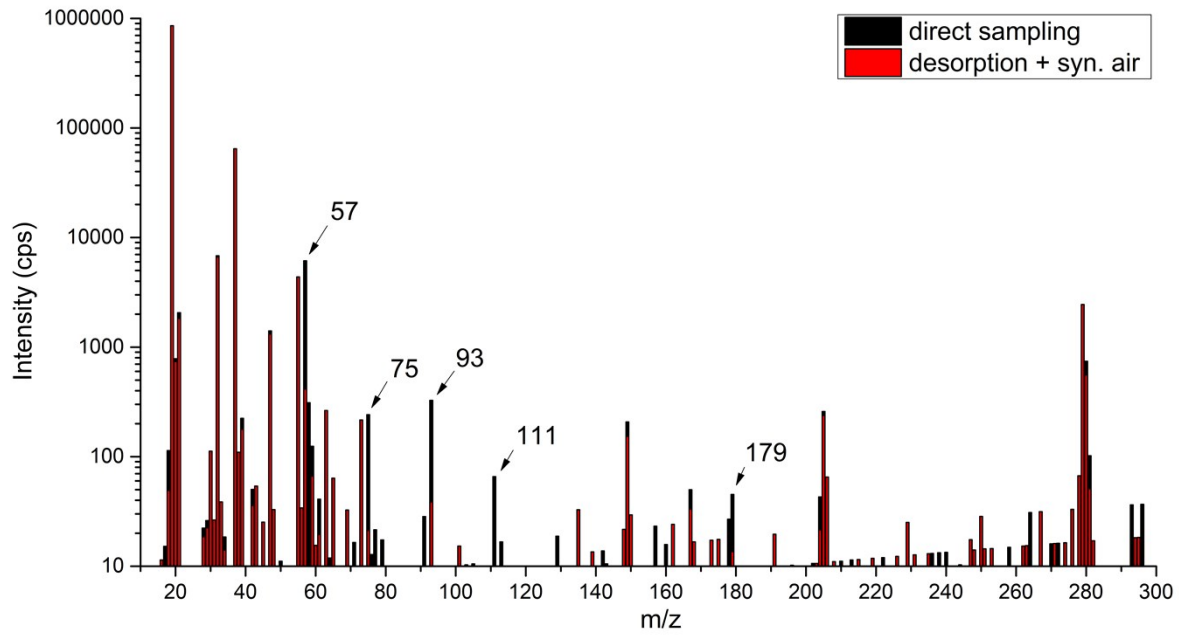

Figure S1: Mass spectrum of DBP using  $\text{H}_3\text{O}^+$  reagent ions. Selected peaks presented during the direct sampling of DPB headspace are not related to the DBP ion chemistry.

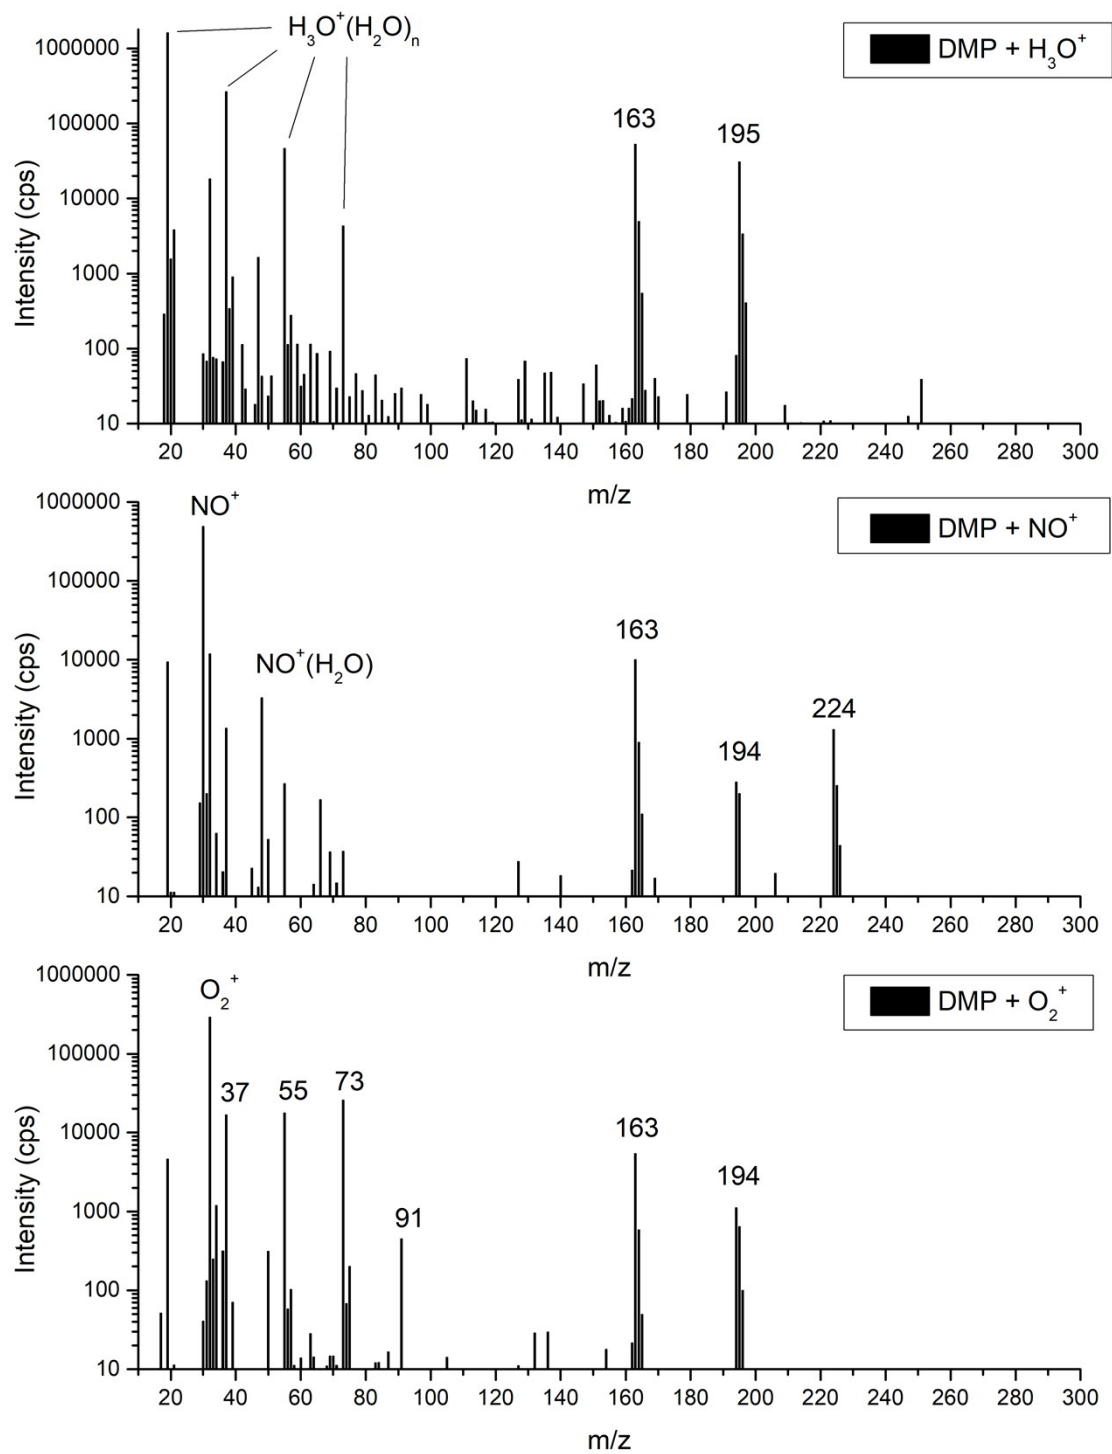

Figure S2: Mass spectrum of DMP using H<sub>3</sub>O<sup>+</sup>, NO<sup>+</sup> and O<sub>2</sub><sup>+</sup> reagent ions.

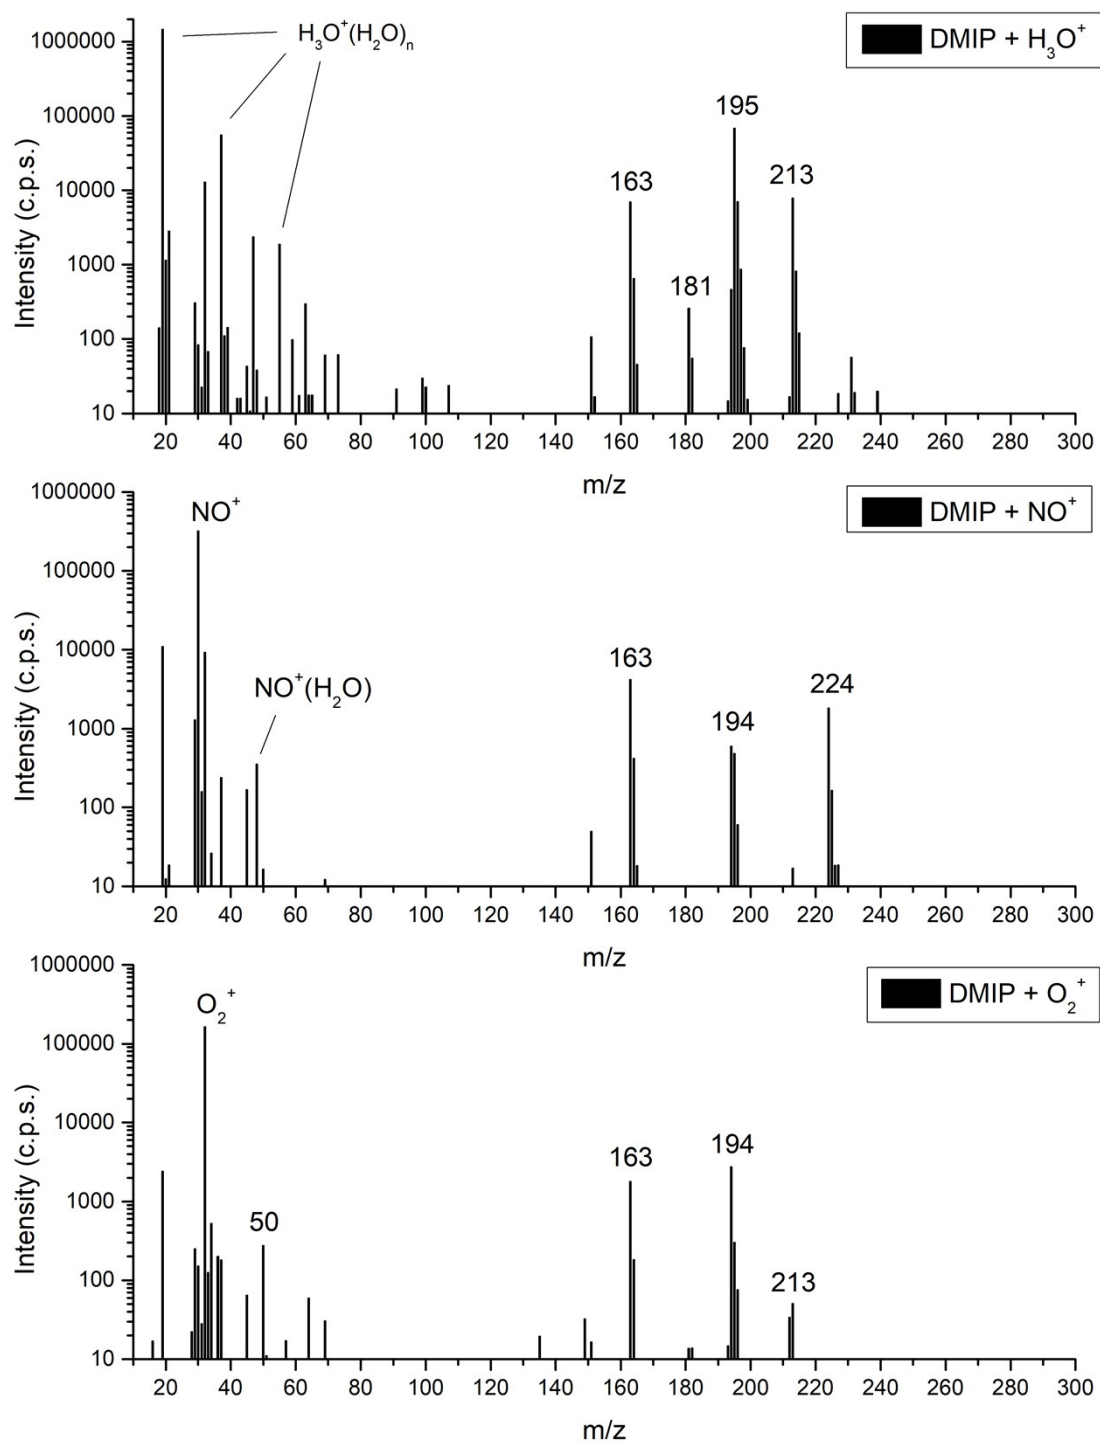

Figure S3: Mass spectrum of DMIP using H<sub>3</sub>O<sup>+</sup>, NO<sup>+</sup> and O<sub>2</sub><sup>+</sup> reagent ions.

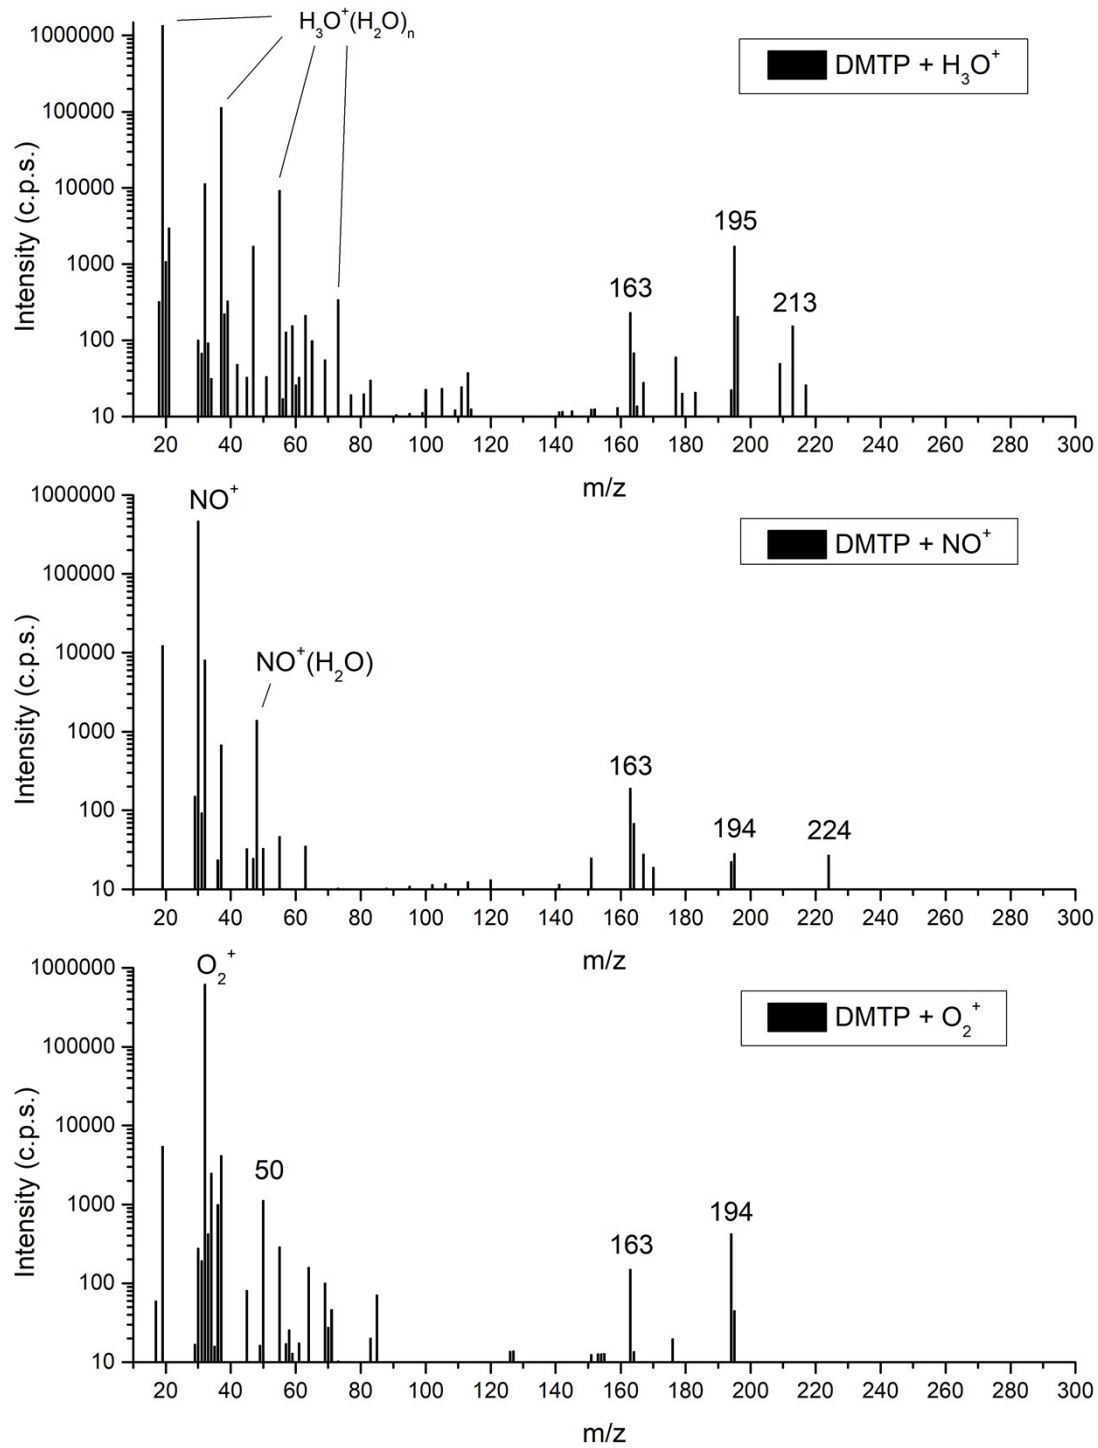

Figure S4: Mass spectrum of DMTP using  $\text{H}_3\text{O}^+$ ,  $\text{NO}^+$  and  $\text{O}_2^+$  reagent ions.

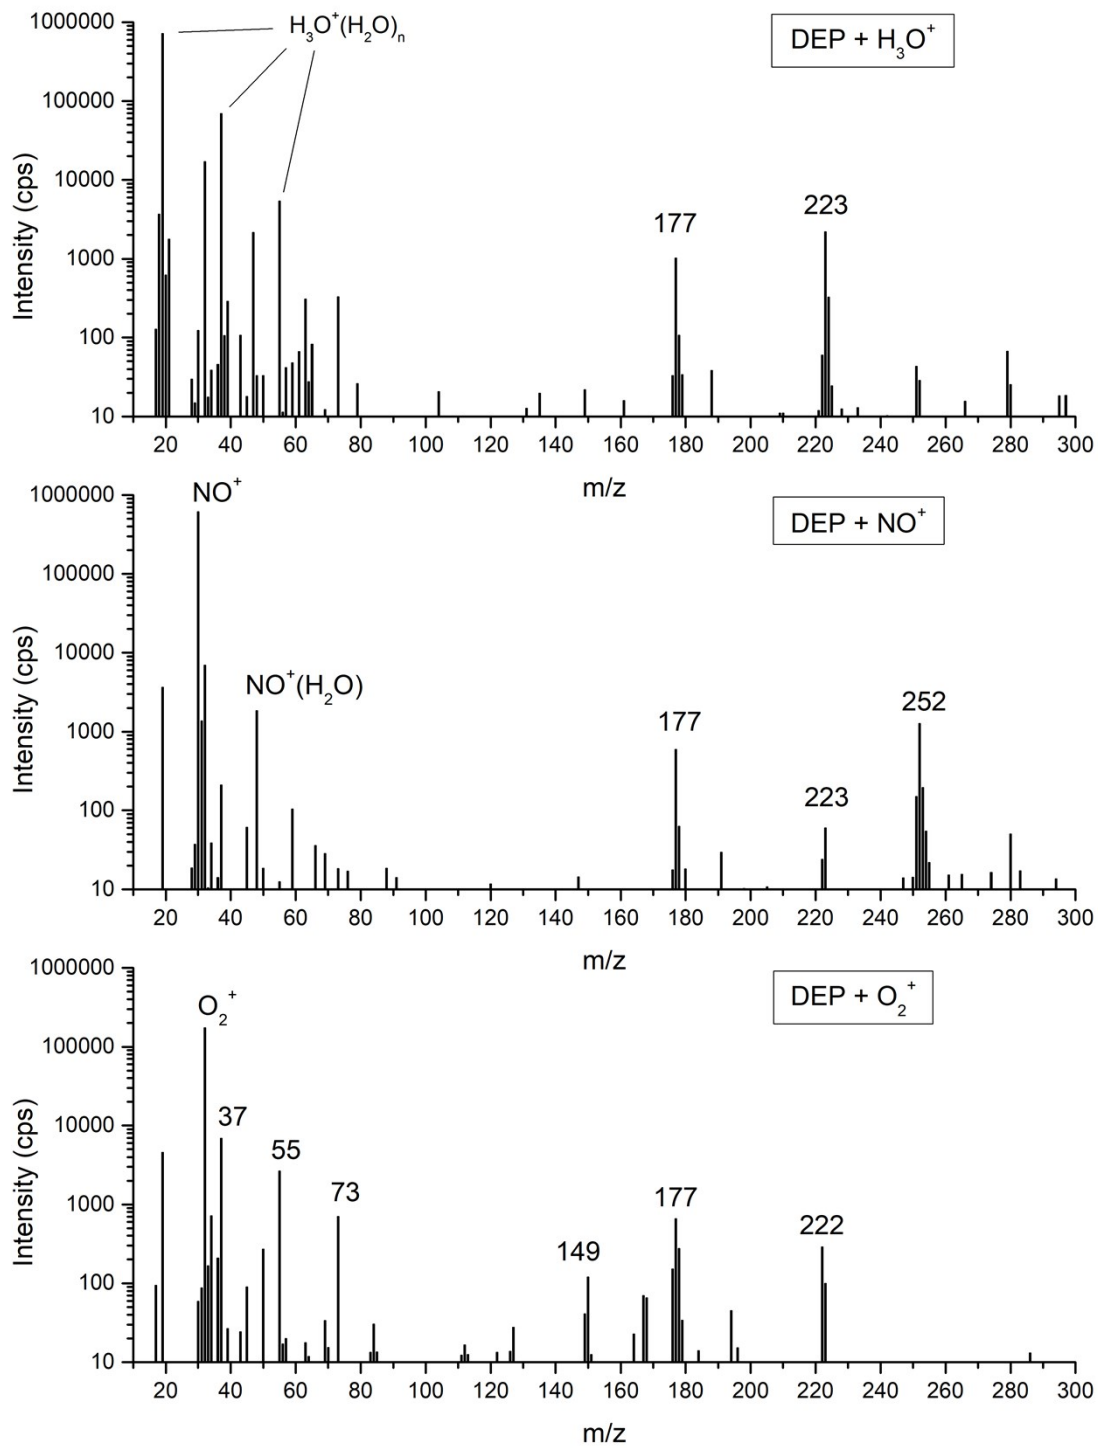

Figure S5: Mass spectrum of DEP using H<sub>3</sub>O<sup>+</sup>, NO<sup>+</sup> and O<sub>2</sub><sup>+</sup> reagent ions.

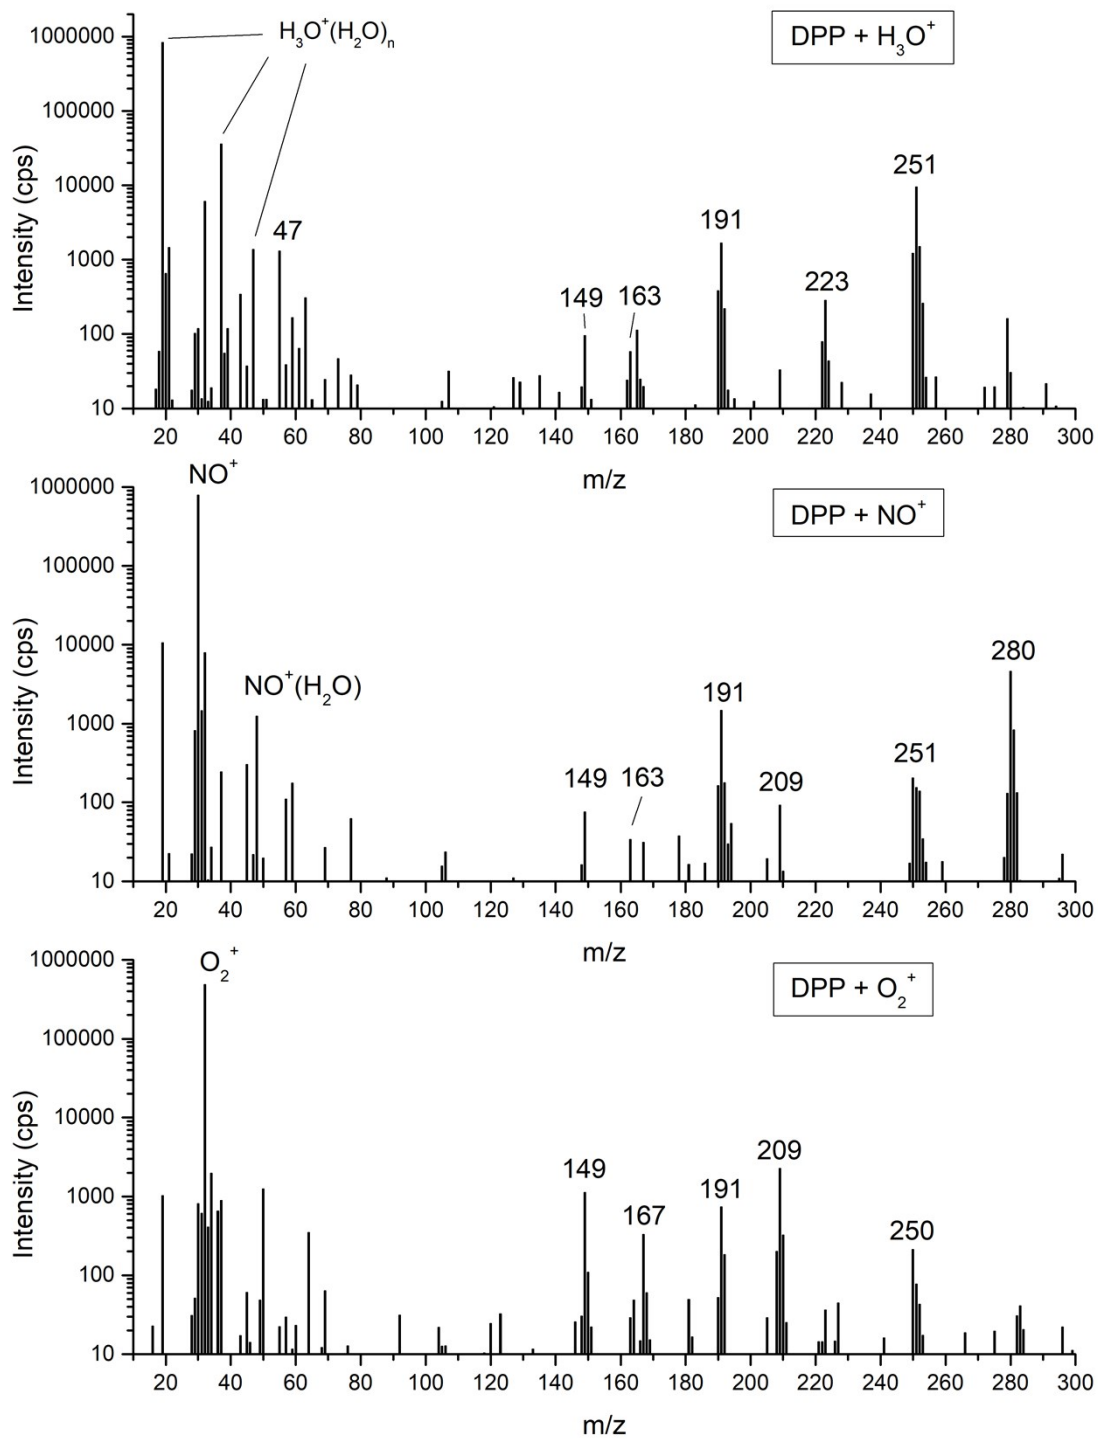

Figure S6: Mass spectrum of DPP using H<sub>3</sub>O<sup>+</sup>, NO<sup>+</sup> and O<sub>2</sub><sup>+</sup> reagent ions.

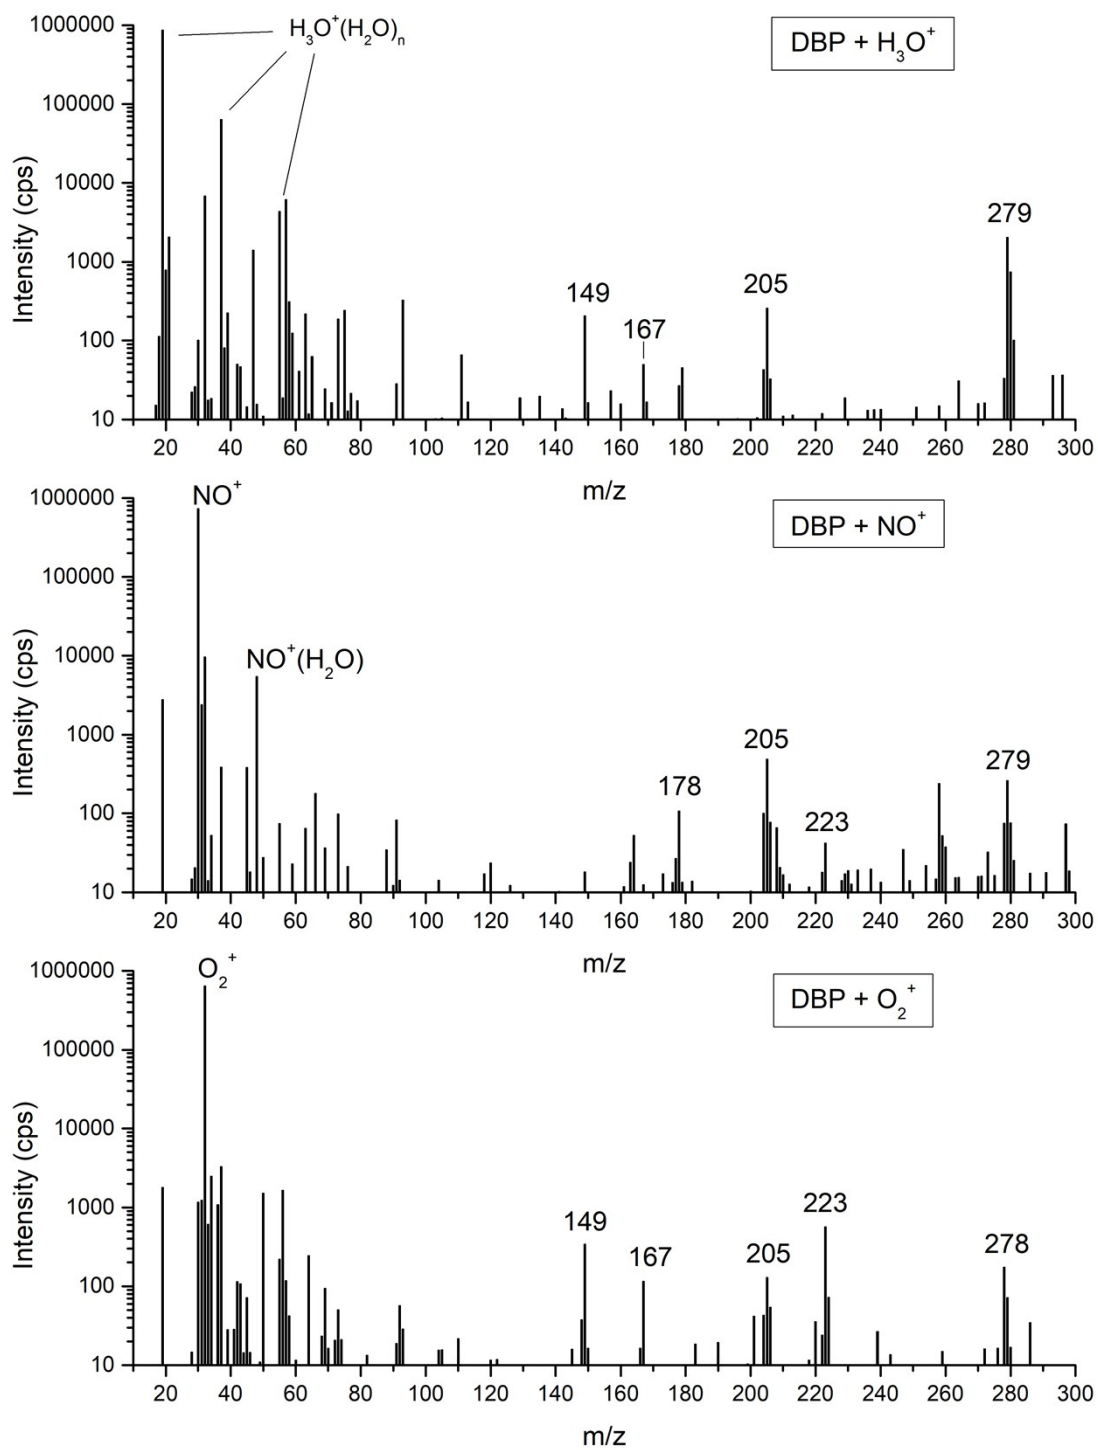

Figure S7: Mass spectrum of DBP using H<sub>3</sub>O<sup>+</sup>, NO<sup>+</sup> and O<sub>2</sub><sup>+</sup> reagent ions.
